# Supplementary material
Source: publisher figshare collection journal article supplement (https://acs.figshare.com/ndownloader/files/5322337)

**Additional file 6** Go enrichment of differentially expressed genes between two different libraries in honey peach fruit (BHP, before hypobaric pressure; NAP, stored for 30 days at 0°C under normal atmospheric pressure (NAP); HP, stored for 30 days at 0°C under 10–20kPa).

## BHP vs NAP

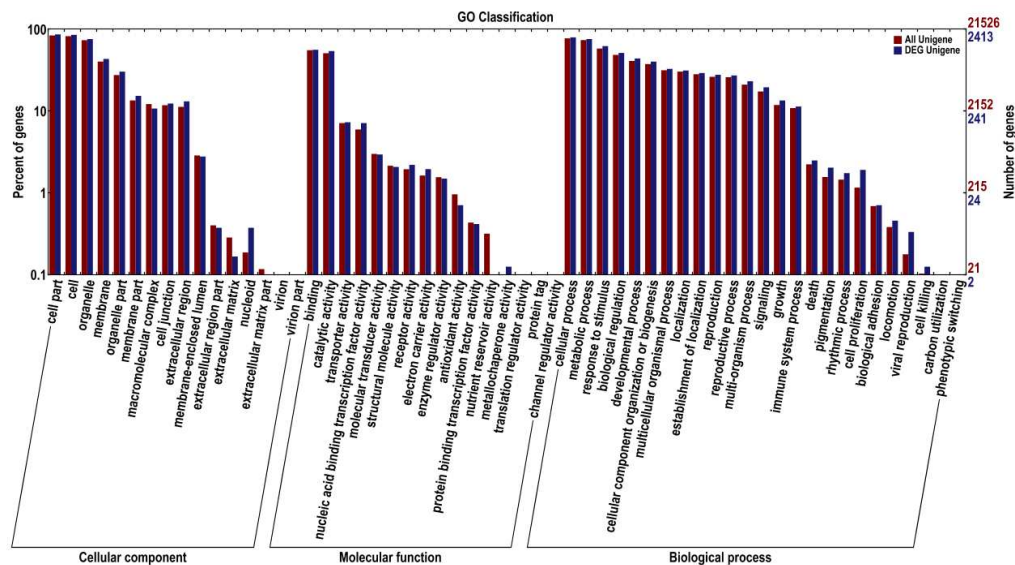

## BHP vs HP

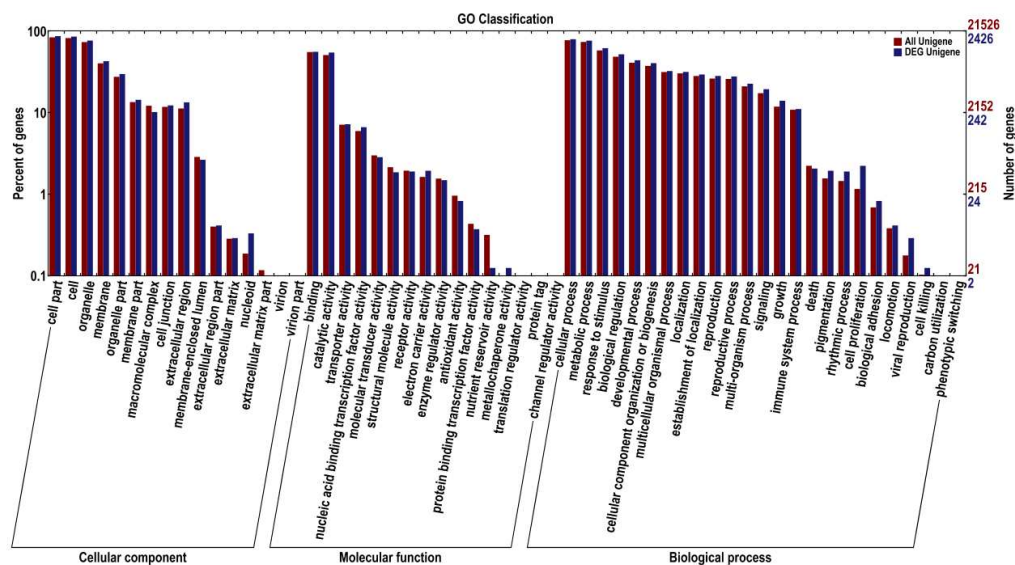

# NAP vs HP

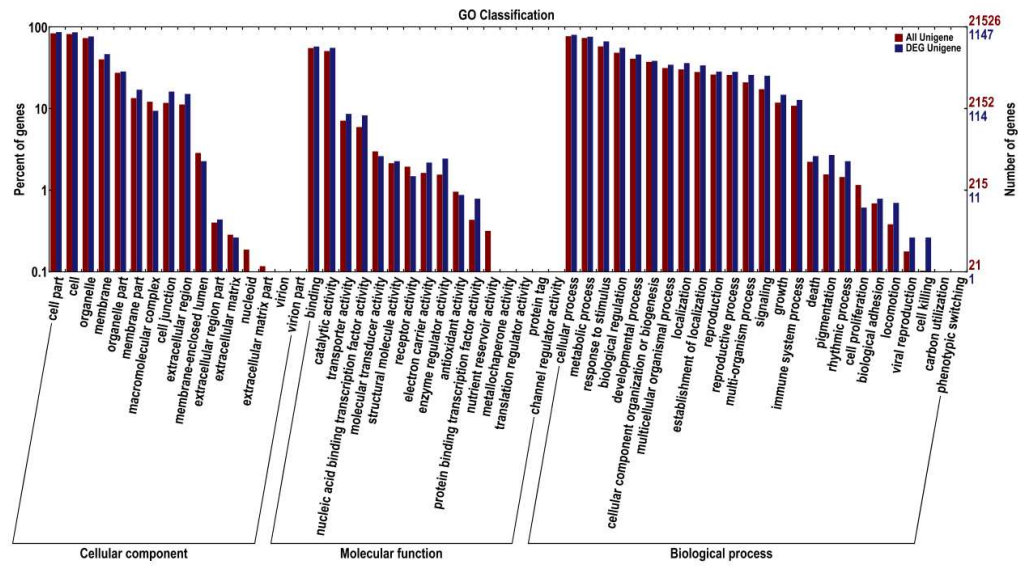

Supplement: Supplementary file 1 [file 5322337]
